# Supplementary material for: Ternary heterogeneous Z-scheme photocatalyst TiO 2 /CuInS 2 /OCN incorporated with carbon quantum dots (CQDs) for enhanced photocatalytic degradation efficiency of reactive yellow 145 dye in water
Source: Royal Society of Chemistry journal article supplement (doi:10.1039/d3ra07546j), 2023-01-01
Supplement: d3ra07546j1.pdf [file d3ra07546j1.pdf]

**Ternary heterogeneous Z-scheme photocatalyst TiO<sub>2</sub>/CuInS<sub>2</sub>/OCN incorporated with carbon quantum dots (CQD) for enhanced photocatalytic degradation efficiency of reactive yellow 145 dye in water**

Manh B. Nguyen<sup>a,b#</sup>, Pham Thi Lan<sup>c#</sup>, Nguyen Tuan Anh<sup>c</sup>, Nguyen Ngoc Tung<sup>d</sup>, Shaoliang Guan<sup>e,f</sup>, Valeska P. Ting<sup>g,h</sup>, T.-Thanh-Bao Nguyen<sup>i</sup>, Huan V. Doan<sup>g</sup>, Mai Thanh Tung, and Tran Dai Lam<sup>c\*</sup>

<sup>a</sup>Institute of Chemistry (ICH), Vietnam Academy of Science and Technology, 18 Hoang Quoc Viet street, Cau Giay, Hanoi, Vietnam.

<sup>b</sup>Graduate University of Science and Technology (GUST), Vietnam Academy of Science and Technology. 18 Hoang Quoc Viet Street, Cau Giay, Hanoi, Vietnam.

<sup>c</sup>Institute for Tropical Technology, Vietnam Academy of Science and Technology, 18 Hoang Quoc Viet, Cau Giay, Hanoi, Vietnam.

<sup>d</sup>Center for Research and Technology Transfer, Vietnam Academy of Science and Technology (VAST), 18 Hoang Quoc Viet Street, Cau Giay, Ha Noi, Vietnam.

<sup>e</sup>School of Chemistry, Cardiff University, Cardiff CF10 3AT, UK.

<sup>f</sup>HarwellXPS, Research Complex at Harwell, Rutherford Appleton Laboratory, Didcot OX11 0FA, UK.

<sup>g</sup>Research School of Chemistry, The Australian National University, AT 2601, Canberra, Australia.

<sup>h</sup>College of Engineering, Computing and Cybernetics, The Australian National University, ACT 2601, Canberra, Australia.

<sup>i</sup>Institute of Physics, Vietnam Academy of Science and Technology, 18 Hoang Quoc Viet, Cau Giay, Hanoi, Viet Nam

<sup>i</sup>Hanoi University of science and technology, 1 Dai Co Viet, Bach Khoa, Hai Ba Trung, Hanoi, Vietnam

# The authors contributed equally to this work

†Corresponding author: trandailam@gmail.com (Tran Dai Lam)

## 1. Chemicals

Titanium isopropoxide (TIP, 97%, Sigma-Aldrich), indium(III) chloride tetrahydrate ( $\text{InCl}_3 \cdot 4\text{H}_2\text{O}$ , 97%, Sigma-Aldrich), Copper(II) nitrate trihydrate ( $\text{Cu}(\text{NO}_3)_2 \cdot 3\text{H}_2\text{O}$ , 99%, Sigma-Aldrich), thioacetamide ( $\text{C}_2\text{H}_5\text{NS}$ , 98%, Sigma-Aldrich), sodium dodecyl sulfate ( $\text{CH}_3(\text{CH}_2)_{11}\text{OSO}_3\text{Na}$ , 98%, China), hydrogen peroxide ( $\text{H}_2\text{O}_2$ , 30%, China), ammonium chloride ( $\text{NH}_4\text{Cl}$ , 98%, China), ethylene glycol (EG, 98%, China), acetic acid ( $\text{CH}_3\text{COOH}$ , 98%, China), ethanol ( $\text{C}_2\text{H}_5\text{OH}$ , 98%, Vietnam) were all purchased and used without further purification.

## 2. Additional figures

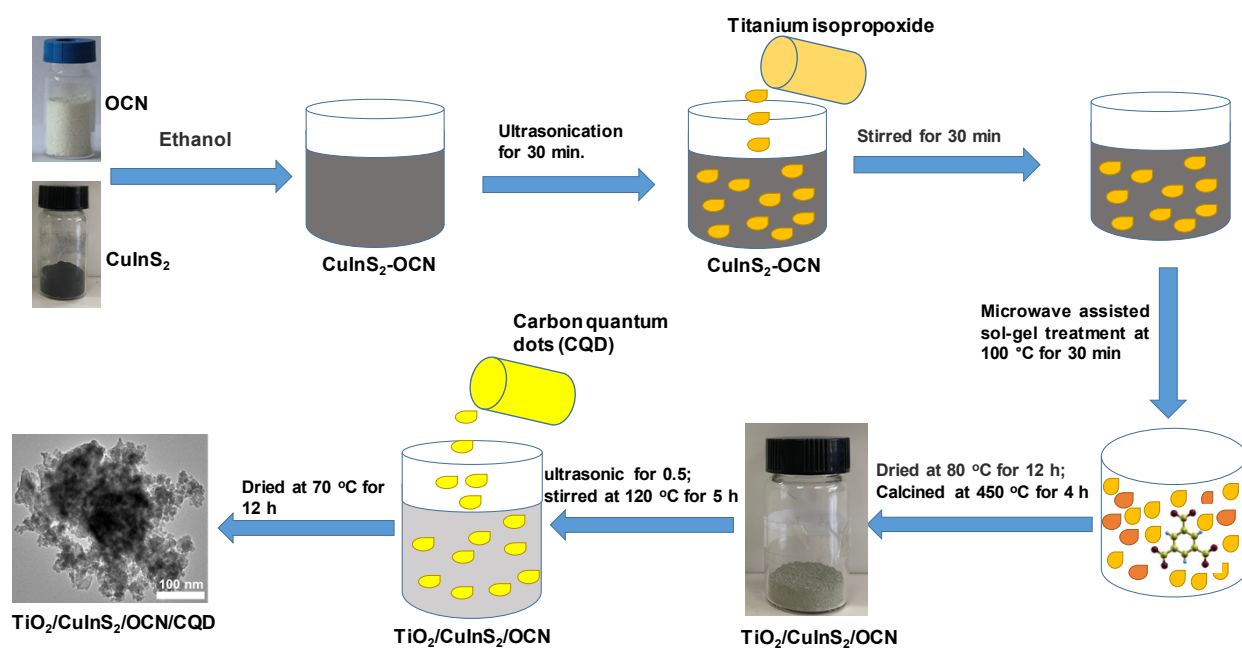

Figure S1. Schematic diagram of the synthesis process of  $\text{TiO}_2/\text{CuInS}_2/\text{OCN}/\text{CQD}$  material

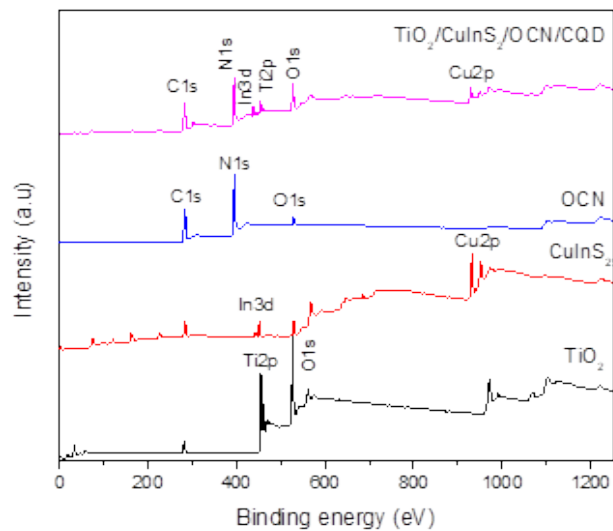

Figure S2. Survey XPS spectra of the  $\text{CuInS}_2$ , OCN,  $\text{TiO}_2$ , and  $\text{TiO}_2/\text{CuInS}_2/\text{OCN}/\text{CQD}$  samples.

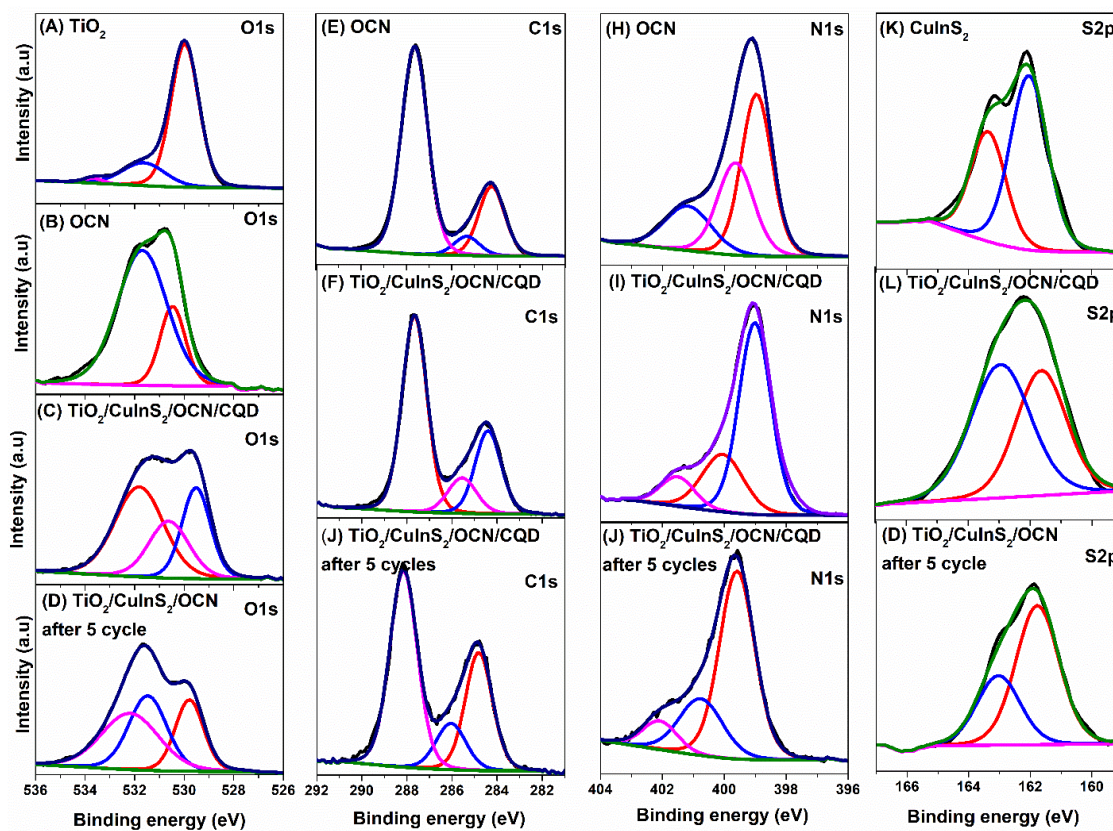

Figure S3. High-resolution O 1s, C 1s, N 1s and S 2p XPS spectra of CuInS<sub>2</sub>, OCN, TiO<sub>2</sub>, TiO<sub>2</sub>/CuInS<sub>2</sub>/OCN/CQD samples

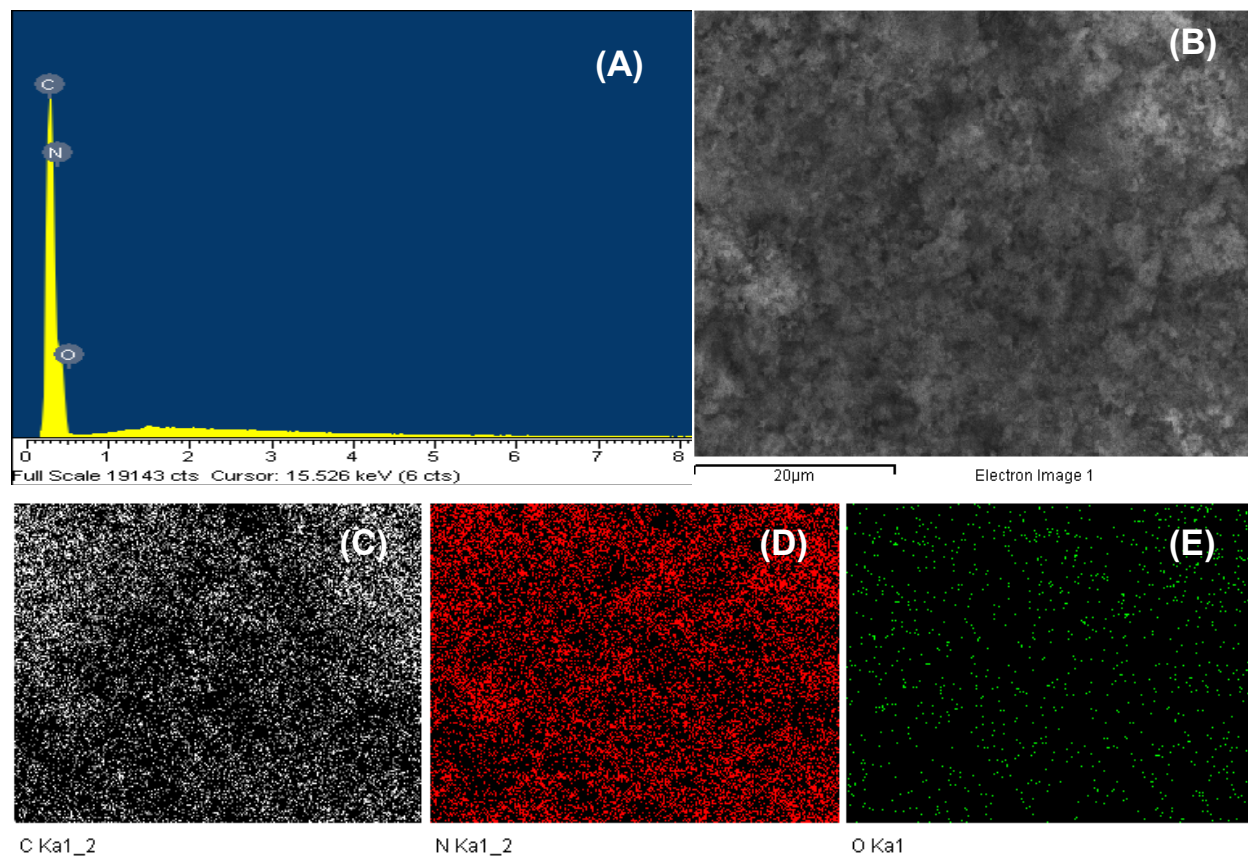

Figure S4. (A) EDS spectrum and (B) EDS-mapping image of OCN sample; EDS elemental mapping images of C (C), N (D) and O (E) in the sample

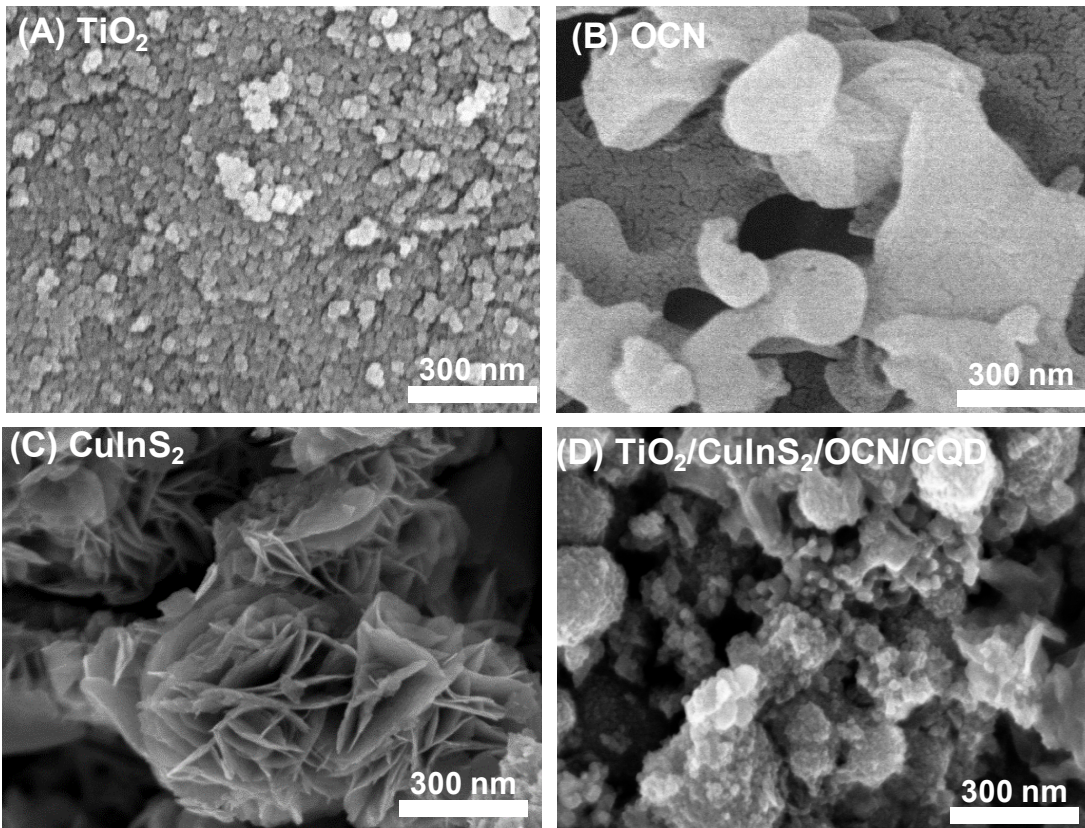

Figure S5. SEM images of  $\text{CuInS}_2$ ,  $\text{TiO}_2$ , OCN and  $\text{TiO}_2/\text{CuInS}_2/\text{OCN}/\text{CQD}$  samples

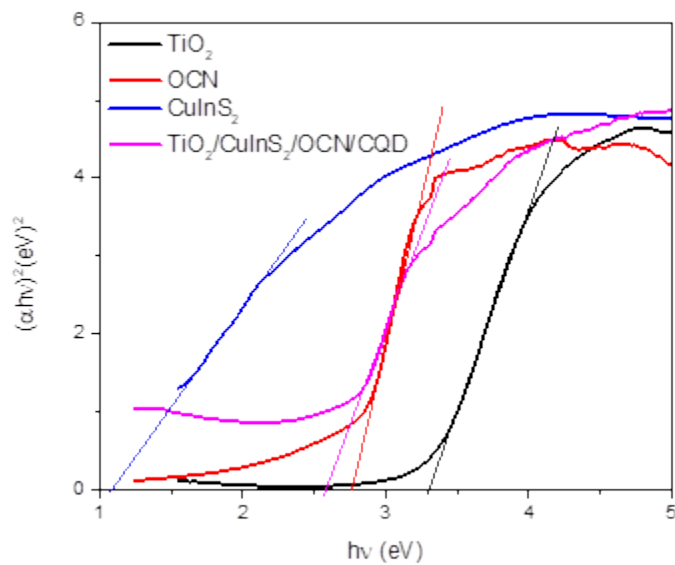

Figure S6. Chart for calculating band gap energy of  $\text{TiO}_2$ ,  $\text{CuInS}_2$ , OCN and  $\text{TiO}_2/\text{CuInS}_2/\text{OCN}$  samples.

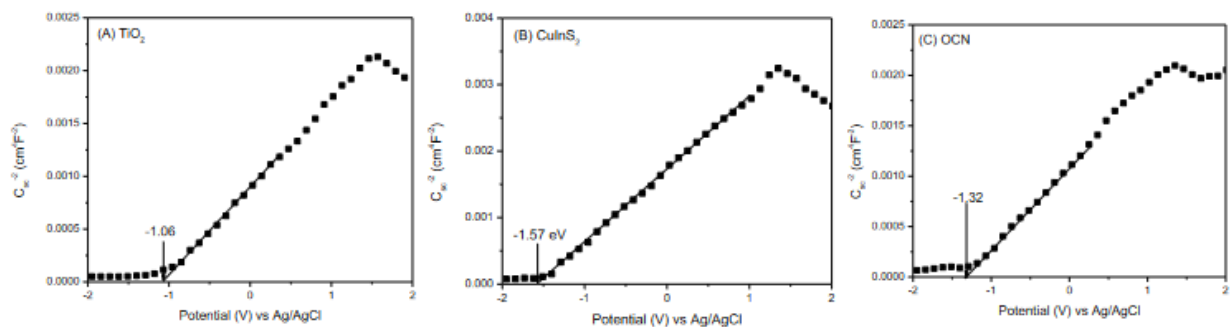

Figure S7. Mott-Schottky characteristics of  $\text{TiO}_2$ ,  $\text{CuInS}_2$  and OCN samples

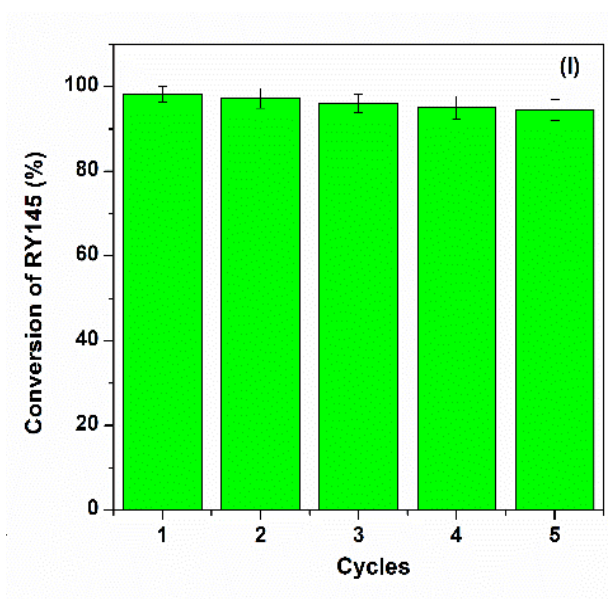

Figure S8. Conversion of RY145 after 5 reaction cycles on  $\text{TiO}_2/\text{CuInS}_2/\text{OCN}/\text{CQD}$  photocatalyst

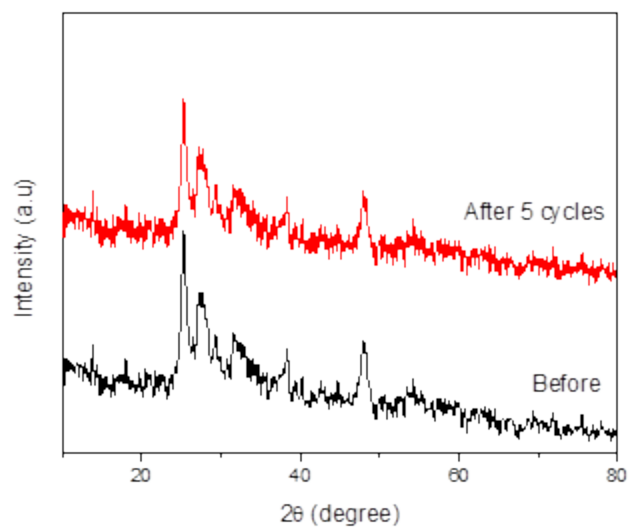

Figure S9. XRD patterns of  $\text{TiO}_2/\text{CuInS}_2/\text{OCN}/\text{CQD}$  before and after 5 reaction cycles

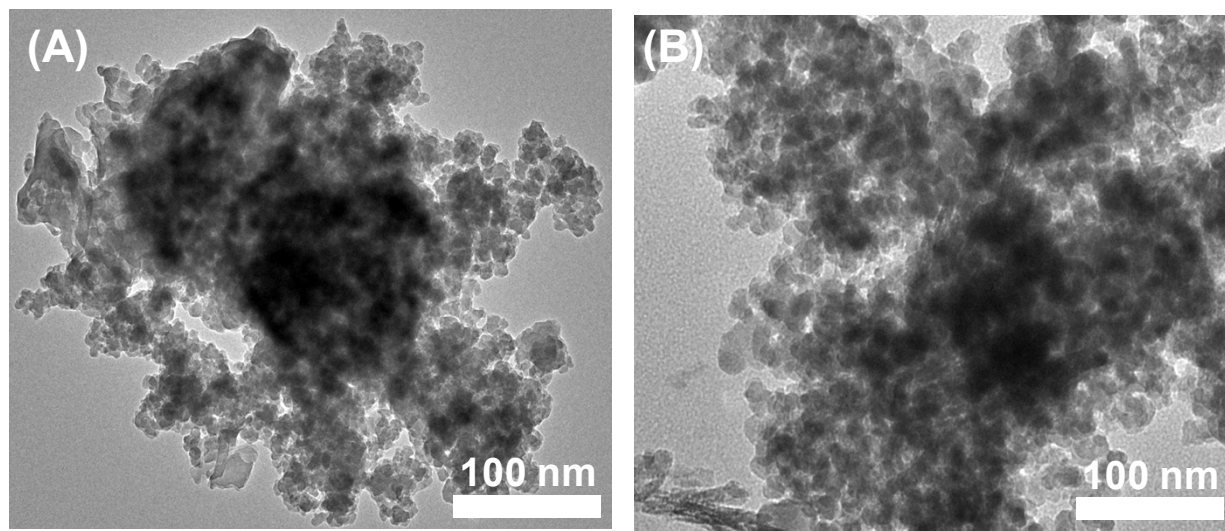

Figure S10. TEM images of  $\text{TiO}_2/\text{CuInS}_2/\text{OCN}/\text{CQD}$  before (A) and after 5 reaction cycles (B)

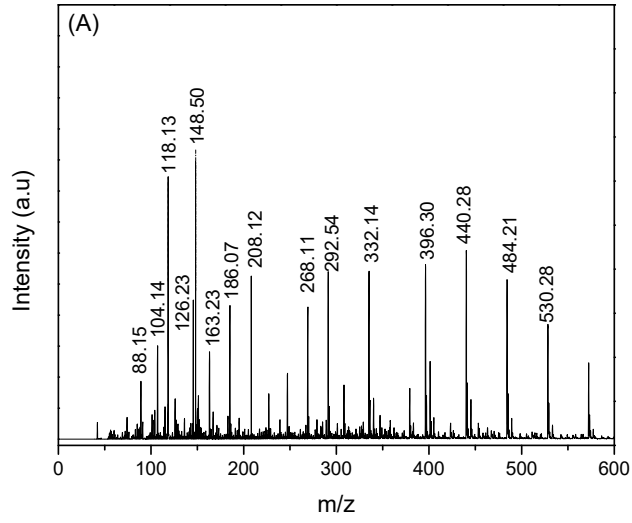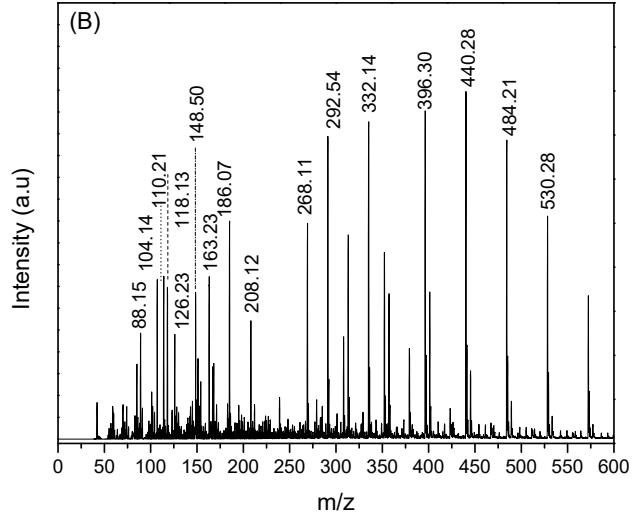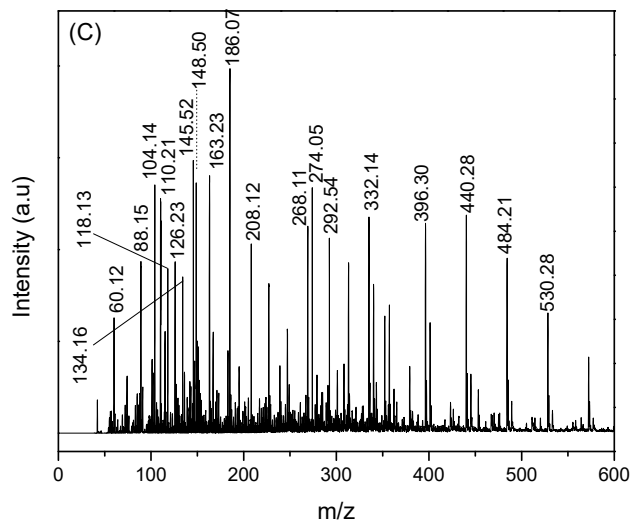



Figure S11. LC-MS spectra of RY145 degraded by  $\text{TiO}_2/\text{CuInS}_2/\text{OCN}/\text{CQD}$  photocatalyst at different reaction times

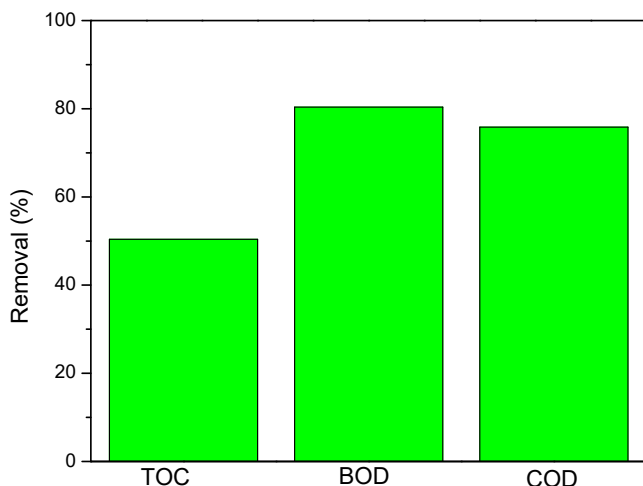

Figure S12. COD, BOD, TOC removal efficiency of RY145 after 60 minutes of visible light irradiation

### 3. Additional tables

Table S1. Binding energies of the bonds in the  $\text{CuInS}_2$ ,  $\text{TiO}_2$ , OCN and  $\text{TiO}_2/\text{CuInS}_2/\text{OCN}/\text{CQD}$  samples

| Element |                  | $\text{CuInS}_2$ | $\text{TiO}_2$ | OCN | $\text{TiO}_2/\text{CuInS}_2/\text{OCN}/\text{CQD}$ | $\text{TiO}_2/\text{CuInS}_2/\text{OCN}/\text{CQD}$<br>after 5 cycles |
|---------|------------------|------------------|----------------|-----|-----------------------------------------------------|-----------------------------------------------------------------------|
| Cu2p    | $\text{Cu}^0$    | 929.52           | -              | -   | -                                                   | -                                                                     |
|         |                  | 949.22           | -              | -   | -                                                   | -                                                                     |
|         | $\text{Cu}^+$    | 932.13           | -              | -   | 931.94                                              | 932.50                                                                |
|         |                  | 952.01           | -              | -   | 951.74                                              | 952.40                                                                |
|         | $\text{Cu}^{2+}$ | 933.42           | -              | -   | 933.19                                              | 934.92                                                                |
|         |                  | 953.78           | -              | -   | 953.78                                              | 954.98                                                                |

|      |                     |        |        |        |        |        |
|------|---------------------|--------|--------|--------|--------|--------|
| In   | In <sup>2+</sup>    | 446.14 | -      | -      | 444.67 | 444.75 |
|      |                     | 453.64 | -      | -      | 452.73 | 452.80 |
|      | In <sup>3+</sup>    | 448.37 | -      | -      | 446.25 | 446.42 |
|      |                     | 455.84 | -      | -      | 453.62 | 453.75 |
| S    | S <sup>2-</sup>     | 162.04 | -      | -      | 161.64 | 161.77 |
|      |                     | 163.36 | -      | -      | 162.95 | 163.03 |
| Ti2p | Ti <sup>4+</sup>    | -      | 458.80 | -      | 458.99 | 459.16 |
|      |                     | -      | 464.56 | -      | 464.71 | 464.12 |
| C1s  | sp <sup>2</sup> C-C | -      | -      | 284.24 | 284.40 | 284.81 |
|      | C-O                 | -      | -      | 285.34 | 285.55 | 286.05 |
|      | N-C=N               | -      | -      | 287.64 | 287.66 | 288.15 |
| N1s  | C-N=C               | -      | -      | 398.97 | 399.01 | 399.59 |
|      | sp <sup>3</sup> N   | -      | -      | 399.64 | 400.05 | 400.76 |
|      | C <sub>2</sub> -NH  | -      | -      | 401.18 | 401.31 | 402.08 |
| O1s  | N-C-O               | -      | -      | 530.47 | 529.52 | 529.79 |
|      | Ti-O                | -      | 529.98 | -      | 530.62 | 531.47 |
|      | -OH groups          | -      | 531.94 | 531.69 | 531.81 | 532.18 |

Table S2. Chemical composition (wt%) of elements in samples TiO<sub>2</sub>, CuInS<sub>2</sub>, OCN and TiO<sub>2</sub>/CuInS<sub>2</sub>/OCN/CQD samples

| Samples                                       | C     | N     | O     | Ti    | Cu    | In    | S     | Total |
|-----------------------------------------------|-------|-------|-------|-------|-------|-------|-------|-------|
| OCN                                           | 44    | 52.32 | 3.68  | -     | -     | -     | -     | 100   |
| CuInS <sub>2</sub>                            | -     | -     | -     | -     | 29.57 | 40.18 | 30.25 | 100   |
| TiO <sub>2</sub>                              | -     | -     | 42.47 | 57.53 | -     | -     | -     | 100   |
| TiO <sub>2</sub> /CuInS <sub>2</sub> /OCN/CQD | 23.47 | 28.75 | 17.62 | 13.71 | 4.65  | 6.88  | 4.92  | 100   |

Table S3. Comparative results of RY145 dye pollutants removal by various heterogeneous materials

| Samples                                             | Reaction conditions                                                                                                          | Removal efficiency (%) | Reaction time (min) | Ref.      |
|-----------------------------------------------------|------------------------------------------------------------------------------------------------------------------------------|------------------------|---------------------|-----------|
| TiO <sub>2</sub> /CuInS <sub>2</sub> /O<br>CN/CQD   | [RY145] = 50 mg/L<br>[Catalyst] = 0.4 g/L<br>Lamp: 15W<br>pH = 5.5                                                           | 98.2                   | 60                  | This work |
| Cu-NiO/ZnO                                          | RY145] = 30 mg/L<br>[Catalyst] = 6 g/L                                                                                       | 99                     | 70                  | [1]       |
| TiO <sub>2</sub> /CQD                               | RY145] = 30 mg/L<br>[Catalyst] = 1 g/L<br>Lamp: intensity: 30,798 lux;<br>Wavelength: 400–700 nm                             | 55                     | 30                  | [2]       |
| ZnO                                                 | RY145] = 5 mg/L<br>[Catalyst] = 1 g/L                                                                                        | 99                     | 320                 | [3]       |
| g-C <sub>3</sub> N <sub>4</sub> -BiOBr              | [RY145] = 50 mg/L<br>[Catalyst] = 1 g/L<br>Lamp: Wonfram 500 W                                                               | 93                     | 60                  | [4]       |
| Cu –ZnO                                             | [RY145] = 40 mg/L<br>[Catalyst] = 1 g/L<br>Lamp: Solar light irradiation                                                     | 80                     | 100                 | [5]       |
| α-Al <sub>2</sub> O <sub>3</sub> NPs                | [RY145] = 60 mg/L<br>[Catalyst] = 0.6 mg/L<br>pH = 6.5<br>Fluorescent lamp (80W)                                             | 95                     | 60                  | [6]       |
| MTiO <sub>3</sub> (M =<br>Sr, Ca, Ba, Pb)           | [RY145]= 50 mg/L<br>[Catalyst] = 0.5 g/L<br>pH = 6.5<br>Lamp: 8 W                                                            | 78                     | 120                 | [7]       |
| g-C <sub>3</sub> N <sub>4</sub> -SrTiO <sub>3</sub> | [RY145]= 50 mg/L<br>[Catalyst] = 1 g/L<br>Lamp: 500 W tungsten                                                               | 100                    | 90                  | [8]       |
| TiO <sub>2</sub> /Activated<br>carbon               | [RY145]= 50 mg/L<br>[Catalyst] = 50 mg/L<br>[H <sub>2</sub> O <sub>2</sub> ] = 2 mL/L<br>pH =3<br>Lamp: Low-pressure mercury | 93                     | 240                 | [9]       |

Table S4. Reactive yellow 145 dye (RY145) degradation under irradiation of visible light intermediates as detected by LC-MS analysis

| m/z    | Probable structure                                                                  | m/z    | Probable structure                                                                    |
|--------|-------------------------------------------------------------------------------------|--------|---------------------------------------------------------------------------------------|
| 530.28 | 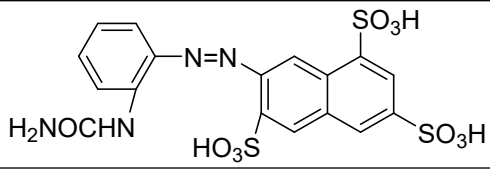   | 332.14 |    |
| 268.11 |    | 396.30 |    |
| 292.54 |    | 186.07 |    |
| 163.23 |    | 158.22 |    |
| 208.12 |   | 158.22 |   |
| 274.05 |  | 134.16 |  |
| 110.21 |  | 118.13 |  |
| 145.52 |  | 104.14 |  |
| 148.5  |  | 88.15  |  |
| 126.23 |  | 60.12  |  |

|        |                                                                                   |  |  |
|--------|-----------------------------------------------------------------------------------|--|--|
| 126.23 | 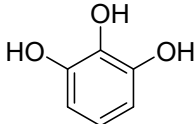 |  |  |
|--------|-----------------------------------------------------------------------------------|--|--|

#### 4. References

- [1] N. Al-Zaqri, Highly operative near full spectrum Cu doped NiO/ZnO photocatalyst: Photodegradation of phenol and organic dyes, *Optical Materials*. 143 (2023) 114139. <https://doi.org/10.1016/j.optmat.2023.114139>.
- [2] S.K. Fatima, A.S. Ceesay, M.S. Khan, R. Sarwar, M. Bilal, J. Uddin, A. Ul-Hamid, A. Khan, N. Riaz, A. Al-Harrasi, Visible Light-Induced Reactive Yellow 145 Discoloration: Structural and Photocatalytic Studies of Graphene Quantum Dot-Incorporated TiO<sub>2</sub>, *ACS Omega*. (2022). <https://doi.org/10.1021/acsomega.2c05805>.
- [3] J.P. Jaison, J.K. Sebastian, Artemisia stelleriana-mediated ZnO nanoparticles for textile dye treatment: a green and sustainable approach, *Water Practice and Technology*. 18 (2023) 911–921. <https://doi.org/10.2166/wpt.2023.041>.
- [4] T. Kanagaraj, S. Thiripuranthagan, S.M.K. Paskalis, H. Abe, Visible light photocatalytic activities of template free porous graphitic carbon nitride—BiOBr composite catalysts towards the mineralization of reactive dyes, *Applied Surface Science*. 426 (2017) 1030–1045. <https://doi.org/10.1016/j.apsusc.2017.07.255>.
- [5] M. Sharma, M. Poddar, Y. Gupta, S. Nigam, D.K. Avasthi, R. Adelung, R. Abolhassani, J. Fiutowski, M. Joshi, Y.K. Mishra, Solar light assisted degradation of dyes and adsorption of heavy metal ions from water by CuO–ZnO tetrapodal hybrid nanocomposite, *Materials Today Chemistry*. 17 (2020) 100336. <https://doi.org/10.1016/j.mtchem.2020.100336>.
- [6] K. Atrak, A. Ramazani, S. Taghavi Fardood, Green synthesis of amorphous and gamma aluminum oxide nanoparticles by tragacanth gel and comparison of their photocatalytic activity for the degradation of organic dyes, *Journal of Materials Science: Materials in Electronics*. 29 (2018) 8347–8353. <https://doi.org/10.1007/s10854-018-8845-2>.
- [7] K. Thamaraiselvi, T. Sivakumar, A. Brindha, E. Elangovan, Photocatalytic Degradation of Reactive Dyes Over Titanates, *Journal of Nanoscience and Nanotechnology*. 19 (2018) 2087–2098. <https://doi.org/10.1166/jnn.2019.15761>.
- [8] T. Sureshkumar, S. Thiripuranthagan, S.M.K. Paskalis, S. Kumaravel, K. Kannan, A. Devarajan, Synthesis, characterization and photodegradation activity of graphitic C<sub>3</sub>N<sub>4</sub>-SrTiO<sub>3</sub> nanocomposites, *Journal of Photochemistry and Photobiology A: Chemistry*. 356 (2018) 425–439. <https://doi.org/10.1016/j.jphotochem.2018.01.027>.
- [9] S.K. Patel, S.G. Patel, G. V. Patel, Degradation of Reactive Dye in Aqueous Solution by Fenton, Photo-Fenton Process and Combination Process with Activated Charcoal and TiO<sub>2</sub>, *Proceedings of the National Academy of Sciences India Section A - Physical Sciences*. 90 (2020) 579–591. <https://doi.org/10.1007/s40010-019-00618-3>.
